# Supplementary material
Source: MDPI journal article supplement (https://www.mdpi.com/2071-1050/11/22/6493)
Supplement: s1 [file s1]

**Supplementary Materials:** The following are available online at [www.mdpi.com/xxx/s1](http://www.mdpi.com/xxx/s1), Figure S1: SSR and flanking region sequences alignment of Roveja and Pisum.

[illegible]

**Figure S1.** SSR and flanking region sequences alignment of Roveja and Pisum. The colored area are the SSR motif.
